# Supplementary material for: Coordination polymers with mixed 4,4′-bipyridine-2,2′,6, 6′-tetracarboxylate and imidazole-containing ligands: synthesis, structure and properties
Source: Royal Society of Chemistry journal article supplement (doi:10.1039/c2ce26338f), 2012-01-01
Supplement: c2ce26338f.pdf [file c2ce26338f.pdf]

## Electronic supplementary information (ESI)

### Coordination polymers with mixed 4,4'-bipyridine-2,2',6,6'-tetracarboxylate and imidazole-containing ligands: synthesis, structure and property†

Min Chen,<sup>a</sup> Zheng-Shuai Bai,<sup>a</sup> Qing Liu,<sup>a</sup> Taka-aki Okamura,<sup>b</sup> Yi Lu<sup>a</sup> and Wei-Yin Sun<sup>\*a</sup>

<sup>a</sup> Coordination Chemistry Institute, State Key Laboratory of Coordination Chemistry, School of Chemistry and Chemical Engineering, Nanjing National Laboratory of Microstructures, Nanjing University, Nanjing 210093, China. E-mail: [sunwy@nju.edu.cn](mailto:sunwy@nju.edu.cn); Fax: +86-25-83314502

<sup>b</sup> Department of Macromolecular Science, Graduate School of Science, Osaka University, Toyonaka, Osaka 560-0043, Japan

**Table S1.** Selected bond lengths (Å) and angles (deg) for complexes **1** - **3**.<sup>a</sup>

| Complex 1    |          |              |          |
|--------------|----------|--------------|----------|
| Mn(1)–O(17)  | 2.156(6) | Mn(1)–O(18)  | 2.171(6) |
| Mn(1)–N(11)  | 2.243(7) | Mn(1)–O(19)  | 2.258(7) |
| Mn(1)–O(3)   | 2.311(5) | Mn(1)–O(5)#1 | 2.317(6) |
| Mn(1)–O(1)   | 2.436(6) | Mn(2)–O(20)  | 2.193(8) |
| Mn(2)–O(26)  | 2.204(8) | Mn(2)–N(112) | 2.222(8) |
| Mn(2)–N(21)  | 2.265(7) | Mn(2)–O(3)#2 | 2.333(5) |
| Mn(2)–O(5)   | 2.354(6) | Mn(2)–O(7)   | 2.470(6) |
| Mn(3)–O(21)  | 2.182(6) | Mn(3)–N(132) | 2.218(8) |
| Mn(3)–N(31)  | 2.262(6) | Mn(3)–O(9)   | 2.271(8) |
| Mn(3)–O(7)#3 | 2.320(5) | Mn(3)–O(11)  | 2.337(6) |

|                     |          |                    |          |
|---------------------|----------|--------------------|----------|
| Mn(3)–O(8)#3        | 2.487(6) | Mn(4)–O(22)        | 2.187(6) |
| Mn(4)–N(152)#4      | 2.209(8) | Mn(4)–N(41)        | 2.264(7) |
| Mn(4)–O(13)         | 2.277(6) | Mn(4)–O(1)#5       | 2.371(6) |
| Mn(4)–O(15)         | 2.383(6) | Mn(4)–O(2)#5       | 2.421(6) |
| O(17)–Mn(1)–O(18)   | 99.5(2)  | O(17)–Mn(1)–N(11)  | 97.8(2)  |
| O(18)–Mn(1)–N(11)   | 137.8(2) | O(17)–Mn(1)–O(19)  | 178.2(3) |
| N(11)–Mn(1)–O(19)   | 83.9(3)  | O(18)–Mn(1)–O(19)  | 78.7(3)  |
| O(18)–Mn(1)–O(3)    | 144.7(2) | O(17)–Mn(1)–O(3)   | 95.2(2)  |
| O(19)–Mn(1)–O(3)    | 86.2(3)  | N(11)–Mn(1)–O(3)   | 70.4(2)  |
| O(18)–Mn(1)–O(5)#1  | 79.5(2)  | O(17)–Mn(1)–O(5)#1 | 84.0(2)  |
| O(19)–Mn(1)–O(5)#1  | 95.3(2)  | N(11)–Mn(1)–O(5)#1 | 140.7(2) |
| O(17)–Mn(1)–O(1)    | 88.9(2)  | O(3)–Mn(1)–O(5)#1  | 70.3(2)  |
| N(11)–Mn(1)–O(1)    | 67.2(2)  | O(18)–Mn(1)–O(1)   | 74.9(2)  |
| O(3)–Mn(1)–O(1)     | 137.6(2) | O(19)–Mn(1)–O(1)   | 91.0(3)  |
| O(20)–Mn(2)–O(26)   | 100.2(4) | O(5)#1–Mn(1)–O(1)  | 151.8(2) |
| O(26)–Mn(2)–N(112)  | 175.1(4) | O(20)–Mn(2)–N(112) | 83.4(3)  |
| O(26)–Mn(2)–N(21)   | 94.7(3)  | O(20)–Mn(2)–N(21)  | 139.3(3) |
| O(20)–Mn(2)–O(3)#2  | 80.8(3)  | N(112)–Mn(2)–N(21) | 84.4(3)  |
| N(112)–Mn(2)–O(3)#2 | 95.7(3)  | O(26)–Mn(2)–O(3)#2 | 81.9(3)  |
| O(20)–Mn(2)–O(5)    | 146.6(3) | N(21)–Mn(2)–O(3)#2 | 139.1(2) |
| N(112)–Mn(2)–O(5)   | 84.9(2)  | O(26)–Mn(2)–O(5)   | 90.3(4)  |
| O(3)#2–Mn(2)–O(5)   | 69.3(2)  | N(21)–Mn(2)–O(5)   | 70.0(2)  |
| O(26)–Mn(2)–O(7)    | 91.3(3)  | O(20)–Mn(2)–O(7)   | 73.9(2)  |
| N(21)–Mn(2)–O(7)    | 68.0(2)  | N(112)–Mn(2)–O(7)  | 92.7(2)  |
| O(5)–Mn(2)–O(7)     | 138.0(2) | O(3)#2–Mn(2)–O(7)  | 152.2(2) |
| O(21)–Mn(3)–N(31)   | 93.6(2)  | O(21)–Mn(3)–N(132) | 165.4(3) |
| O(21)–Mn(3)–O(9)    | 94.6(3)  | N(132)–Mn(3)–N(31) | 88.9(3)  |
| N(31)–Mn(3)–O(9)    | 69.9(2)  | N(132)–Mn(3)–O(9)  | 99.8(3)  |
| N(132)–Mn(3)–O(7)#3 | 95.3(2)  | O(21)–Mn(3)–O(7)#3 | 89.7(2)  |
| O(9)–Mn(3)–O(7)#3   | 80.3(2)  | N(31)–Mn(3)–O(7)#3 | 150.2(2) |
| N(132)–Mn(3)–O(11)  | 84.9(2)  | O(21)–Mn(3)–O(11)  | 82.7(2)  |
| O(9)–Mn(3)–O(11)    | 137.5(2) | N(31)–Mn(3)–O(11)  | 68.0(2)  |
| O(21)–Mn(3)–O(8)#3  | 86.5(2)  | O(7)#3–Mn(3)–O(11) | 141.7(2) |

|                        |          |                       |          |
|------------------------|----------|-----------------------|----------|
| N(31)–Mn(3)–O(8)#3     | 154.8(2) | N(132)–Mn(3)–O(8)#3   | 85.3(3)  |
| O(7)#3–Mn(3)–O(8)#3    | 54.9(2)  | O(9)–Mn(3)–O(8)#3     | 135.2(2) |
| O(22)–Mn(4)–N(152)#4   | 177.9(3) | O(11)–Mn(3)–O(8)#3    | 87.1(2)  |
| N(152)#4–Mn(4)–N(41)   | 88.5(3)  | O(22)–Mn(4)–N(41)     | 90.8(2)  |
| N(152)#4–Mn(4)–O(13)   | 92.9(3)  | O(22)–Mn(4)–O(13)     | 85.0(2)  |
| O(22)–Mn(4)–O(1)#5     | 91.6(2)  | N(41)–Mn(4)–O(13)     | 71.2(2)  |
| N(41)–Mn(4)–O(1)#5     | 145.1(2) | N(152)#4–Mn(4)–O(1)#5 | 90.1(3)  |
| O(22)–Mn(4)–O(15)      | 90.6(2)  | O(13)–Mn(4)–O(1)#5    | 143.6(2) |
| N(41)–Mn(4)–O(15)      | 67.8(2)  | N(152)#4–Mn(4)–O(15)  | 91.0(2)  |
| O(1)#5–Mn(4)–O(15)     | 77.4(2)  | O(13)–Mn(4)–O(15)     | 138.7(2) |
| N(152)#4–Mn(4)–O(2)#5  | 91.9(2)  | O(22)–Mn(4)–O(2)#5    | 88.1(2)  |
| O(13)–Mn(4)–O(2)#5     | 88.1(2)  | N(41)–Mn(4)–O(2)#5    | 159.3(2) |
| O(15)–Mn(4)–O(2)#5     | 132.8(2) | O(1)#5–Mn(4)–O(2)#5   | 55.5(2)  |
| <b>Complex 2</b>       |          |                       |          |
| Ni(1)–N(81)            | 1.988(2) | Ni(1)–N(112)          | 2.057(3) |
| Ni(1)–N(12)            | 2.078(3) | Ni(1)–N(32)#1         | 2.090(3) |
| Ni(1)–O(5)             | 2.128(2) | Ni(1)–O(7)            | 2.206(2) |
| Ni(2)–N(71)#2          | 1.977(3) | Ni(2)–N(52)           | 2.025(3) |
| Ni(2)–N(132)#3         | 2.093(3) | Ni(2)–N(152)          | 2.114(3) |
| Ni(2)–O(1)#2           | 2.151(3) | Ni(2)–O(3)#2          | 2.184(2) |
| N(81)–Ni(1)–N(112)     | 175.2(1) | N(81)–Ni(1)–N(12)     | 92.5(1)  |
| N(112)–Ni(1)–N(12)     | 91.9(1)  | N(81)–Ni(1)–N(32)#1   | 89.0(1)  |
| N(112)–Ni(1)–N(32)#1   | 86.8(1)  | N(12)–Ni(1)–N(32)#1   | 174.1(1) |
| N(81)–Ni(1)–O(5)       | 78.0(1)  | N(112)–Ni(1)–O(5)     | 99.8(1)  |
| N(12)–Ni(1)–O(5)       | 93.1(1)  | N(32)#1–Ni(1)–O(5)    | 92.9(1)  |
| N(81)–Ni(1)–O(7)       | 76.1(1)  | N(112)–Ni(1)–O(7)     | 106.0(1) |
| N(12)–Ni(1)–O(7)       | 88.2(1)  | N(32)#1–Ni(1)–O(7)    | 86.6(1)  |
| O(5)–Ni(1)–O(7)        | 154.1(1) | N(71)#2–Ni(2)–N(52)   | 176.1(1) |
| N(71)#2–Ni(2)–N(132)#3 | 90.3(1)  | N(52)–Ni(2)–N(132)#3  | 92.6(1)  |
| N(71)#2–Ni(2)–N(152)   | 89.8(1)  | N(52)–Ni(2)–N(152)    | 87.5(1)  |
| N(132)#3–Ni(2)–N(152)  | 175.7(1) | N(71)#2–Ni(2)–O(1)#2  | 77.7(1)  |
| N(52)–Ni(2)–O(1)#2     | 99.7(1)  | N(132)#3–Ni(2)–O(1)#2 | 93.0(1)  |
| N(152)–Ni(2)–O(1)#2    | 91.3(1)  | N(71)#2–Ni(2)–O(3)#2  | 77.3(1)  |

|                       |          |                         |          |
|-----------------------|----------|-------------------------|----------|
| N(52)–Ni(2)–O(3)#2    | 105.3(1) | N(132)#3–Ni(2)–O(3)#2   | 88.0(1)  |
| N(152)–Ni(2)–O(3)#2   | 87.6(1)  | O(1)#2–Ni(2)–O(3)#2     | 154.9(1) |
| <b>Complex 3</b>      |          |                         |          |
| Co(1)–N(11)#1         | 2.053(3) | Co(1)–N(212)            | 2.091(3) |
| Co(1)–N(132)#2        | 2.118(3) | Co(1)–N(112)            | 2.140(3) |
| Co(1)–O(5)#1          | 2.144(3) | Co(1)–O(7)#1            | 2.213(3) |
| Co(2)–N(21)           | 2.028(3) | Co(2)–N(152)#2          | 2.051(3) |
| Co(2)–N(252)#3        | 2.134(4) | Co(2)–N(232)            | 2.154(4) |
| Co(2)–O(3)            | 2.180(3) | Co(2)–O(1)              | 2.208(3) |
| N(11)#1–Co(1)–N(212)  | 174.3(1) | N(11)#1–Co(1)–N(132)#2  | 92.4(1)  |
| N(212)–Co(1)–N(132)#2 | 92.4(1)  | N(11)#1–Co(1)–N(112)    | 88.6(1)  |
| N(212)–Co(1)–N(112)   | 87.1(1)  | N(132)#2–Co(1)–N(112)   | 173.9(1) |
| N(11)#1–Co(1)–O(5)#1  | 75.8(1)  | N(212)–Co(1)–O(5)#1     | 100.9(1) |
| N(132)#2–Co(1)–O(5)#1 | 92.9(1)  | N(112)–Co(1)–O(5)#1     | 93.2(1)  |
| N(11)#1–Co(1)–O(7)#1  | 74.5(1)  | N(212)–Co(1)–O(7)#1     | 108.7(1) |
| N(132)#2–Co(1)–O(7)#1 | 88.4(1)  | N(112)–Co(1)–O(7)#1     | 86.1(1)  |
| O(5)#1–Co(1)–O(7)#1   | 150.3(1) | N(21)–Co(2)–N(152)#2    | 174.9(1) |
| N(21)–Co(2)–N(252)#3  | 89.4(1)  | N(152)#2–Co(2)–N(252)#3 | 94.1(1)  |
| N(21)–Co(2)–N(232)    | 89.2(1)  | N(152)#2–Co(2)–N(232)   | 87.7(1)  |
| N(252)#3–Co(2)–N(232) | 175.0(1) | N(21)–Co(2)–O(3)        | 76.0(1)  |
| N(152)#2–Co(2)–O(3)   | 100.1(1) | N(252)#3–Co(2)–O(3)     | 93.9(1)  |
| N(232)–Co(2)–O(3)     | 90.4(2)  | N(21)–Co(2)–O(1)        | 75.8(1)  |
| N(152)#2–Co(2)–O(1)   | 108.0(1) | N(252)#3–Co(2)–O(1)     | 87.5(1)  |
| N(232)–Co(2)–O(1)     | 87.5(1)  | O(3)–Co(2)–O(1)         | 151.7(1) |

Symmetry transformations used to generate equivalent atoms: #1  $x, y, z+1$ ; #2  $x, y, z-1$ ; #3  $-x+1, y-1/2, -z+1$ ; #4  $-x+1, y+1/2, -z+1$ ; #5  $-x+1, y+1/2, -z+2$  for **1**; #1  $-x+1, y-1/2, -z+1/2$ ; #2  $x, -y+1/2, z-1/2$ ; #3  $x+1, y, z$  for **2**; #1  $x, -y+1/2, z-1/2$ ; #2  $-x+1, y+1/2, -z+1/2$ ; #3  $x-1, y, z$  for **3**.

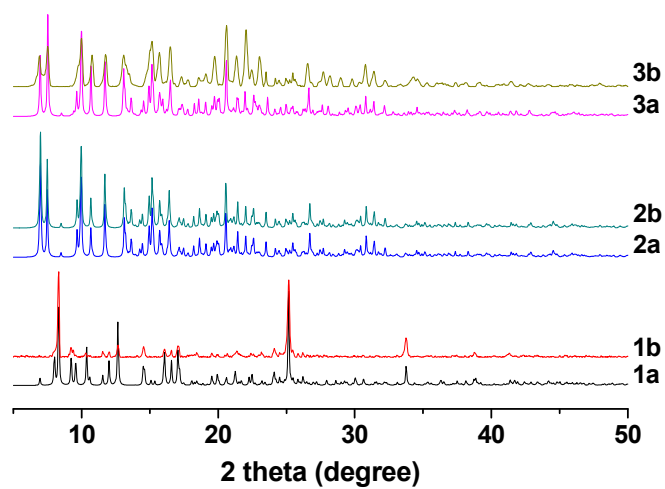

**Fig. S1.** The PXRD patterns of complexes **1-3**: a – simulated; b – as-synthesized.

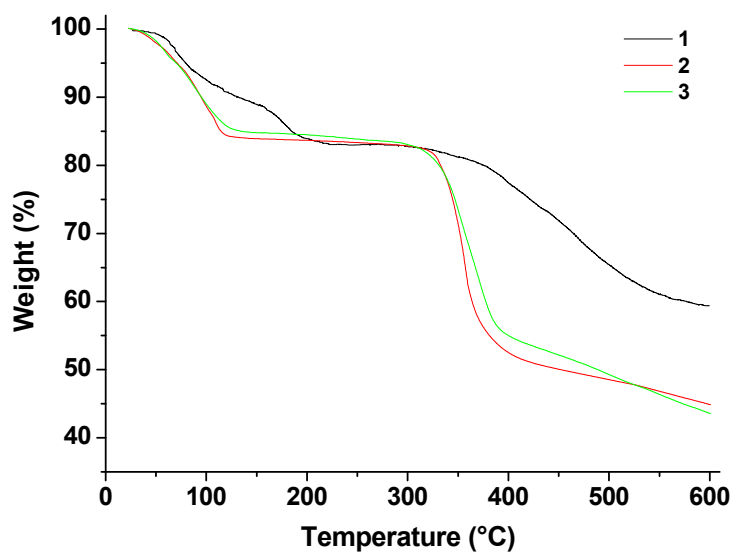

**Fig. S2.** The TGA curves of complexes **1 - 3**.

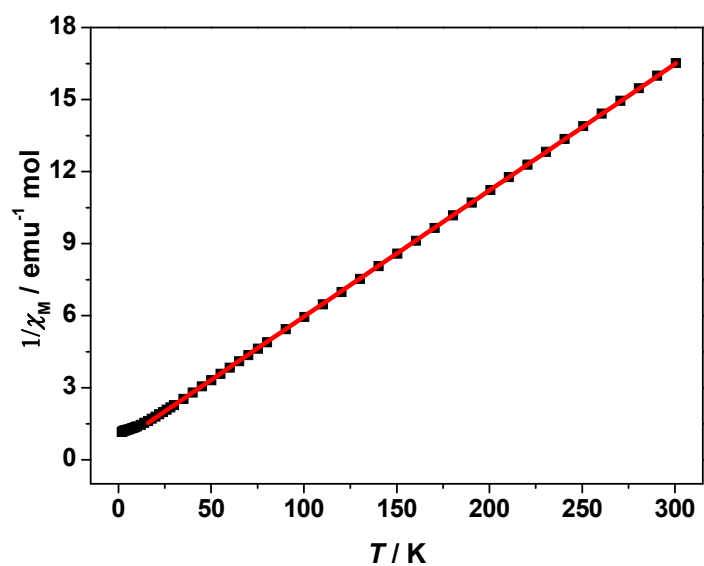

**Fig. S3.** Temperature dependence of  $1/\chi_M$  for **1** in the range of ca. 14 - 300 K. The solid line shows the Curie–Weiss fitting.

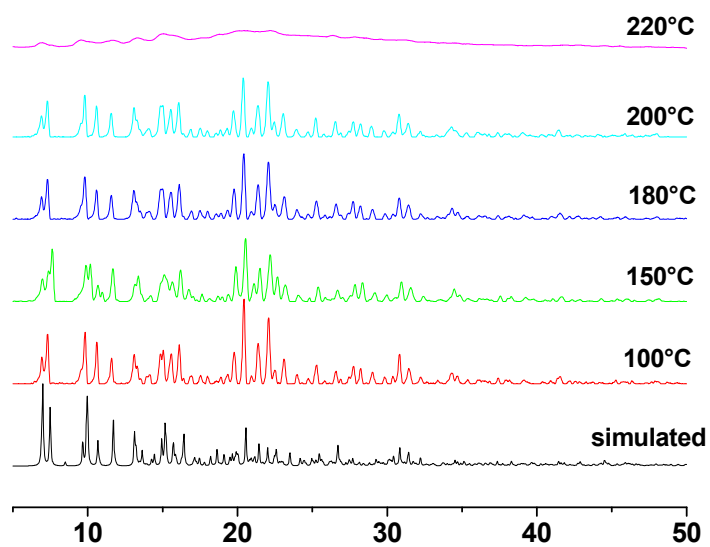

**Fig. S4.** Comparison of the PXRD patterns of **2** evacuated at different temperatures.

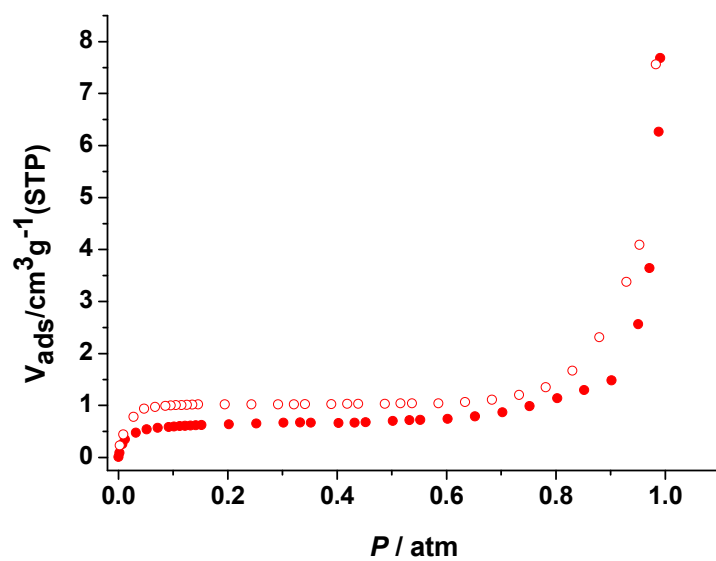

**Fig. S5.** N<sub>2</sub> adsorption isotherms for complex **2** at 77 K: filled shape, adsorption; open shape, desorption.
